# Supplementary material for: Iptacopan monotherapy in patients with paroxysmal nocturnal hemoglobinuria: a 2-cohort open-label proof-of-concept study
Source: PubMed Central journal article supplement — Blood Adv. 2022 May 16;6(15):4450–60. doi: 10.1182/bloodadvances.2022006960 (PMC9636331; doi:10.1182/bloodadvances.2022006960), 2022-05-16
Supplement: mmc1.pdf [file mmc1.pdf]

1 **Supplementary Table 1. Absolute and percent change from baseline for laboratory**  
 2 **parameters at weeks 2, 4, 8, and 12 (pharmacodynamic analysis set)**  
 3  
 4

|                                    |         | Iptacopan 25 mg/100 mg<br>n=7 |                        |                | Iptacopan 50 mg/200 mg<br>n=6 |                        |                |
|------------------------------------|---------|-------------------------------|------------------------|----------------|-------------------------------|------------------------|----------------|
|                                    |         | Raw                           | Absolute<br>change     | %Change        | Raw                           | Absolute<br>change     | %Change        |
| <b>Lactate dehydrogenase (U/L)</b> |         |                               |                        |                |                               |                        |                |
| <b>Baseline</b>                    | n       | 7                             |                        |                | 6                             |                        |                |
|                                    | Mean    | 2159.6                        |                        |                | 2172.6                        |                        |                |
|                                    | 90% CI  | (1484.0,<br>2835.1)           |                        |                | (1561.9,<br>2783.2)           |                        |                |
| <b>Week 2</b>                      | n       | 7                             | 7                      | 7              | 5                             | 5                      | 5              |
|                                    | Mean    | 531.9                         | -1627.7                | -76.5          | 286.2                         | -1929.0                | -85.0          |
|                                    | 90% CI  | (119.6,<br>944.1)             | (-2240.0, -<br>1015.5) | (-90.1, -63.0) | (227.2,<br>345.2)             | (-2725.4, -<br>1132.7) | (-92.8, -77.2) |
|                                    | P-value | 0.0461                        | 0.0021                 | <.0001         | 0.0005                        | 0.0067                 | <.0001         |
| <b>Week 4</b>                      | n       | 7                             | 7                      | 7              | 5                             | 5                      | 5              |
|                                    | Mean    | 395.7                         | -1763.9                | -79.7          | 198.8                         | -2016.4                | -89.7          |
|                                    | 90% CI  | (170.6,<br>620.8)             | (-2428.5, -<br>1099.2) | (-91.5, -68.0) | (153.5,<br>244.1)             | (-2799.9, -<br>1232.9) | (-94.9, -84.5) |
|                                    | P-value | 0.0142                        | 0.0021                 | <.0001         | 0.0007                        | 0.0054                 | <.0001         |
| <b>Week 8</b>                      | n       | 7                             | 7                      | 7              | 5                             | 5                      | 5              |
|                                    | Mean    | 300.3                         | -1859.3                | -81.7          | 216.6                         | -1998.6                | -88.3          |
|                                    | 90% CI  | (108.4,<br>492.1)             | (-2617.8, -<br>1100.7) | (-98.5, -65.0) | (138.7,<br>294.5)             | (-2810.7, -<br>1186.6) | (-96.6, -80.0) |
|                                    | P-value | 0.0228                        | 0.0031                 | <.0001         | 0.0041                        | 0.0063                 | <.0001         |
| <b>Week 12</b>                     | n       | 6                             | 6                      | 6              | 4                             | 4                      | 4              |
|                                    | Mean    | 238.8                         | -1821.7                | -86.2          | 246.3                         | -1836.7                | -85.9          |
|                                    | 90% CI  | (165.4,<br>312.3)             | (-2614.2, -<br>1029.1) | (-93.5, -78.9) | (158.3,<br>334.2)             | (-2907.2, -<br>766.3)  | (-96.5, -75.3) |
|                                    | P-value | 0.0012                        | 0.0057                 | <.0001         | 0.0071                        | 0.0273                 | 0.0003         |
| <b>Hemoglobin (g/L)</b>            |         |                               |                        |                |                               |                        |                |
| <b>Baseline</b>                    | n       | 7                             |                        |                | 5                             |                        |                |
|                                    | Mean    | 88.5                          |                        |                | 76.9                          |                        |                |
|                                    | 90% CI  | (78.6, 98.5)                  |                        |                | (64.9, 88.9)                  |                        |                |
| <b>Week 2</b>                      | n       | 7                             | 7                      | 7              | 4                             | 4                      | 4              |
|                                    | Mean    | 95.4                          | 6.9                    | 8.1            | 104.3                         | 31.8                   | 45.5           |
|                                    | 90% CI  | (85.4, 105.4)                 | (2.6, 11.1)            | (2.9, 13.2)    | (97.4, 111.1)                 | (19.6, 44.0)           | (24.1, 66.8)   |
|                                    | P-value | <.0001                        | 0.0203                 | 0.0229         | <.0001                        | 0.0087                 | 0.0153         |
| <b>Week 4</b>                      | n       | 6                             | 6                      | 6              | 4                             | 4                      | 4              |
|                                    | Mean    | 95.5                          | 9.6                    | 11.6           | 109.0                         | 36.6                   | 51.8           |
|                                    | 90% CI  | (82.6, 108.4)                 | (-0.1, 19.4)           | (-0.1, 23.4)   | (89.6, 128.4)                 | (15.6, 57.6)           | (19.6, 84.1)   |
|                                    | P-value | <.0001                        | 0.1038                 | 0.1022         | 0.0009                        | 0.0264                 | 0.0323         |
| <b>Week 8</b>                      | n       | 7                             | 7                      | 7              | 4                             | 4                      | 4              |
|                                    | Mean    | 103.6                         | 15.0                   | 18.1           | 110.5                         | 38.1                   | 53.0           |
|                                    | 90% CI  | (95.3, 111.9)                 | (8.3, 21.7)            | (9.5, 26.6)    | (78.3, 142.7)                 | (7.5, 68.6)            | (8.0, 98.1)    |
|                                    | P-value | <.0001                        | 0.0049                 | 0.0065         | 0.0040                        | 0.0608                 | 0.0696         |
| <b>Week 12</b>                     | n       | 6                             | 6                      | 6              | 3                             | 3                      | 3              |
|                                    | Mean    | 115.2                         | 23.4                   | 26.7           | 109.0                         | 37.1                   | 51.8           |
|                                    | 90% CI  | (105.6,<br>124.7)             | (11.5, 35.2)           | (12.8, 40.6)   | (58.9, 159.1)                 | (-7.0, 81.2)           | (-14.3, 117.9) |

|                              | P-value | <.0001         | 0.0105          | 0.0117          | 0.0239         | 0.1334          | 0.1495           |
|------------------------------|---------|----------------|-----------------|-----------------|----------------|-----------------|------------------|
| <b>Bilirubin (µmol/L)</b>    |         |                |                 |                 |                |                 |                  |
| <b>Baseline</b>              | n       | 7              |                 |                 | 6              |                 |                  |
|                              | Mean    | 32.4           |                 |                 | 35.3           |                 |                  |
|                              | 90% CI  | (27.2, 37.6)   |                 |                 | (23.3, 47.3)   |                 |                  |
| <b>Week 2</b>                | n       | 7              | 7               | 7               | 5              | 5               | 5                |
|                              | Mean    | 12.6           | -19.8           | -60.8           | 12.6           | -23.9           | -64.2            |
|                              | 90% CI  | (8.0, 17.2)    | (-25.6, -14.0)  | (-74.2, -47.3)  | (3.3, 21.9)    | (-39.9, -8.0)   | (-87.2, -41.1)   |
|                              | P-value | 0.0018         | 0.0005          | 0.0001          | 0.0441         | 0.0330          | 0.0040           |
| <b>Week 4</b>                | n       | 7              | 7               | 7               | 5              | 5               | 5                |
|                              | Mean    | 12.4           | -20.0           | -58.8           | 10.6           | -25.9           | -70.0            |
|                              | 90% CI  | (8.5, 16.3)    | (-27.8, -12.2)  | (-75.0, -42.6)  | (2.7, 18.5)    | (-41.2, -10.7)  | (-88.9, -51.1)   |
|                              | P-value | 0.0008         | 0.0025          | 0.0004          | 0.0465         | 0.0222          | 0.0014           |
| <b>Week 8</b>                | n       | 7              | 7               | 7               | 5              | 5               | 5                |
|                              | Mean    | 12.1           | -20.2           | -59.7           | 11.0           | -25.5           | -68.2            |
|                              | 90% CI  | (5.6, 18.6)    | (-29.5, -11.0)  | (-86.3, -33.0)  | (3.8, 18.2)    | (-41.2, -9.8)   | (-86.1, -50.3)   |
|                              | P-value | 0.0110         | 0.0054          | 0.0048          | 0.0316         | 0.0257          | 0.0012           |
| <b>Week 12</b>               | n       | 6              | 6               | 6               | 4              | 4               | 4                |
|                              | Mean    | 11.7           | -21.6           | -64.4           | 14.8           | -23.2           | -57.5            |
|                              | 90% CI  | (8.9, 14.4)    | (-26.5, -16.7)  | (-72.3, -56.5)  | (6.2, 23.3)    | (-44.6, -1.8)   | (-80.1, -34.9)   |
|                              | P-value | 0.0004         | 0.0003          | <.0001          | 0.0270         | 0.0842          | 0.0093           |
| <b>Reticulocyte (10E9/L)</b> |         |                |                 |                 |                |                 |                  |
| <b>Baseline</b>              | n       | 7              |                 |                 | 6              |                 |                  |
|                              | Mean    | 217.6          |                 |                 | 211.1          |                 |                  |
|                              | 90% CI  | (168.4, 266.7) |                 |                 | (132.3, 289.8) |                 |                  |
| <b>Week 2</b>                | n       | 7              | 7               | 7               | 5              | 5               | 5                |
|                              | Mean    | 134.6          | -83.0           | -34.0           | 106.2          | -94.2           | -19.0            |
|                              | 90% CI  | (98.1, 171.1)  | (-140.8, -25.2) | (-53.7, -14.2)  | (74.6, 137.8)  | (-201.6, 13.2)  | (-92.6, 54.5)    |
|                              | P-value | 0.0004         | 0.0316          | 0.0155          | 0.0020         | 0.1347          | 0.6105           |
| <b>Week 4</b>                | n       | 6              | 6               | 6               | 5              | 5               | 5                |
|                              | Mean    | 110.7          | -118.4          | -47.3           | 67.8           | -132.6          | -56.4            |
|                              | 90% CI  | (87.8, 133.5)  | (-181.6, -55.3) | (-65.1, -29.5)  | (39.8, 95.8)   | (-219.5, -45.8) | (-83.3, -29.5)   |
|                              | P-value | 0.0002         | 0.0129          | 0.0031          | 0.0067         | 0.0312          | 0.0111           |
| <b>Week 8</b>                | n       | 7              | 7               | 7               | 5              | 5               | 5                |
|                              | Mean    | 103.9          | -113.7          | -49.5           | 81.0           | -119.4          | -33.3            |
|                              | 90% CI  | (72.9, 134.8)  | (-166.8, -60.6) | (-66.3, -32.6)  | (59.9, 102.1)  | (-231.0, -7.8)  | (-105.1, 38.6)   |
|                              | P-value | 0.0006         | 0.0059          | 0.0013          | 0.0012         | 0.0846          | 0.3799           |
| <b>Week 12</b>               | n       | 6              | 6               | 6               | 4              | 4               | 4                |
|                              | Mean    | 130.8          | -93.0           | -35.4           | 104.8          | -84.9           | -8.7             |
|                              | 90% CI  | (92.5, 169.2)  | (-169.9, -16.1) | (-59.0, -11.7)  | (65.4, 144.1)  | (-230.1, 60.3)  | (-125.4, 108.1)  |
|                              | P-value | 0.0010         | 0.0588          | 0.0295          | 0.0082         | 0.2625          | 0.8722           |
| <b>Haptoglobin (g/L)</b>     |         |                |                 |                 |                |                 |                  |
| <b>Baseline</b>              | n       | 7              |                 |                 | 6              |                 |                  |
|                              | Mean    | 0.1            |                 |                 | 0.1            |                 |                  |
|                              | 90% CI  | (, )           |                 |                 | (, )           |                 |                  |
| <b>Week 2</b>                | n       | 7              | 7               | 7               | 5              | 5               | 5                |
|                              | Mean    | 0.3            | 0.2             | 445.7           | 0.4            | 0.4             | 716.0            |
|                              | 90% CI  | (0.1, 0.5)     | (0.0, 0.4)      | (77.3, 814.1)   | (-0.1, 0.9)    | (-0.1, 0.8)     | (-236.3, 1668.3) |
|                              | P-value | 0.0281         | 0.0570          | 0.0570          | 0.1418         | 0.1842          | 0.1842           |
| <b>Week 4</b>                | n       | 7              | 7               | 7               | 5              | 5               | 5                |
|                              | Mean    | 0.2            | 0.2             | 374.3           | 0.5            | 0.4             | 876.0            |
|                              | 90% CI  | (0.0, 0.4)     | (-0.0, 0.4)     | (-0.3, 748.9)   | (0.0, 1.0)     | (-0.0, 0.9)     | (-58.3, 1810.3)  |
|                              | P-value | 0.0491         | 0.1002          | 0.1002          | 0.0899         | 0.1163          | 0.1163           |
| <b>Week 8</b>                | n       | 7              | 7               | 7               | 5              | 5               | 5                |
|                              | Mean    | 0.4            | 0.3             | 654.3           | 0.4            | 0.4             | 728.0            |
|                              | 90% CI  | (0.0, 0.7)     | (-0.0, 0.7)     | (-16.1, 1324.6) | (0.1, 0.8)     | (0.0, 0.7)      | (15.5, 1440.5)   |

|                |         |             |             |                 |             |             |                 |
|----------------|---------|-------------|-------------|-----------------|-------------|-------------|-----------------|
|                | P-value | 0.0714      | 0.1067      | 0.1067          | 0.0684      | 0.0949      | 0.0949          |
| <b>Week 12</b> | n       | 6           | 6           | 6               | 5           | 5           | 5               |
|                | Mean    | 0.2         | 0.2         | 396.7           | 0.2         | 0.1         | 260.0           |
|                | 90% CI  | (-0.0, 0.5) | (-0.1, 0.5) | (-189.8, 983.1) | (-0.0, 0.4) | (-0.1, 0.3) | (-169.3, 689.3) |
|                | P-value | 0.1486      | 0.2311      | 0.2311          | 0.1484      | 0.2663      | 0.2663          |

**Erythrocytes (10E12/L)**

|                 |         |            |            |              |            |            |               |
|-----------------|---------|------------|------------|--------------|------------|------------|---------------|
| <b>Baseline</b> | n       | 7          |            |              | 6          |            |               |
|                 | Mean    | 3.1        |            |              | 2.5        |            |               |
|                 | 90% CI  | (2.7, 3.4) |            |              | (2.1, 2.9) |            |               |
| <b>Week 2</b>   | n       | 7          | 7          | 7            | 5          | 5          | 5             |
|                 | Mean    | 3.5        | 0.5        | 16.2         | 3.4        | 1.0        | 45.3          |
|                 | 90% CI  | (3.2, 3.9) | (0.3, 0.6) | (11.4, 21.0) | (2.9, 3.8) | (0.6, 1.4) | (23.4, 67.2)  |
|                 | P-value | <.0001     | 0.0006     | 0.0006       | <.0001     | 0.0050     | 0.0116        |
| <b>Week 4</b>   | n       | 6          | 6          | 6            | 5          | 5          | 5             |
|                 | Mean    | 3.8        | 0.7        | 24.4         | 3.6        | 1.3        | 55.7          |
|                 | 90% CI  | (3.2, 4.4) | (0.4, 1.1) | (13.7, 35.1) | (3.0, 4.3) | (0.7, 1.8) | (23.7, 87.6)  |
|                 | P-value | <.0001     | 0.0063     | 0.0058       | 0.0003     | 0.0105     | 0.0206        |
| <b>Week 8</b>   | n       | 7          | 7          | 7            | 5          | 5          | 5             |
|                 | Mean    | 4.2        | 1.2        | 39.5         | 3.7        | 1.4        | 60.9          |
|                 | 90% CI  | (3.8, 4.6) | (0.9, 1.4) | (26.8, 52.2) | (2.9, 4.6) | (0.6, 2.1) | (21.5, 100.4) |
|                 | P-value | <.0001     | 0.0002     | 0.0009       | 0.0006     | 0.0181     | 0.0301        |
| <b>Week 12</b>  | n       | 6          | 6          | 6            | 4          | 4          | 4             |
|                 | Mean    | 4.6        | 1.4        | 44.7         | 3.8        | 1.4        | 60.1          |
|                 | 90% CI  | (4.1, 5.0) | (0.9, 1.8) | (28.1, 61.3) | (2.7, 4.9) | (0.5, 2.3) | (12.8, 107.4) |
|                 | P-value | <.0001     | 0.0014     | 0.0029       | 0.0041     | 0.0370     | 0.0581        |

1 Note: Change refers to change from baseline.

2 CI, confidence interval; SD, standard deviation

1 **Supplementary Table 2. Absolute and percent change from baseline in C3d+type-II,**  
2 **type-III erythrocytes and PNH clone size at weeks 2, 4, 8 and 12 (pharmacodynamic**  
3 **analysis set)**

|                                             |         | Iptacopan 25 mg/100 mg<br>n=7 |                    |                | Iptacopan 50 mg/200 mg<br>n=6 |                    |                  |
|---------------------------------------------|---------|-------------------------------|--------------------|----------------|-------------------------------|--------------------|------------------|
|                                             |         | Raw                           | Absolute<br>change | % Change       | Raw                           | Absolute<br>change | % Change         |
| <b>C3d+type-III erythrocytes (%)</b>        |         |                               |                    |                |                               |                    |                  |
| <b>Baseline</b>                             | n       | 7                             |                    |                | 6                             |                    |                  |
|                                             | Mean    | 1.5                           |                    |                | 1.6                           |                    |                  |
|                                             | 90% CI  | (0.8, 2.3)                    |                    |                | (-0.2, 3.4)                   |                    |                  |
| <b>Week 2</b>                               | n       | 7                             | 7                  | 7              | 5                             | 5                  | 5                |
|                                             | Mean    | 0.8                           | -0.7               | -53.5          | 1.0                           | -0.9               | -73.2            |
|                                             | 90% CI  | (0.1, 1.4)                    | (-1.4, -0.0)       | (-82.5, -24.5) | (-0.9, 2.9)                   | (-2.0, 0.3)        | (-106.8, -39.6)  |
|                                             | P-value | 0.0575                        | 0.0916             | 0.0116         | 0.3138                        | 0.1958             | 0.0097           |
| <b>Week 4</b>                               | n       | 7                             | 7                  | 7              | 5                             | 5                  | 5                |
|                                             | Mean    | 0.6                           | -0.9               | -52.5          | 0.2                           | -1.6               | -83.0            |
|                                             | 90% CI  | (0.3, 1.0)                    | (-1.7, -0.1)       | (-73.2, -31.8) | (-0.0, 0.5)                   | (-3.6, 0.3)        | (-87.7, -78.2)   |
|                                             | P-value | 0.0158                        | 0.0722             | 0.0026         | 0.1114                        | 0.1460             | <.0001           |
| <b>Week 8</b>                               | n       | 7                             | 7                  | 7              | 5                             | 5                  | 5                |
|                                             | Mean    | 0.2                           | -1.3               | -84.0          | 0.1                           | -1.7               | -94.6            |
|                                             | 90% CI  | (0.1, 0.4)                    | (-2.0, -0.6)       | (-92.8, -75.3) | (-0.1, 0.3)                   | (-3.7, 0.3)        | (-96.8, -92.4)   |
|                                             | P-value | 0.0259                        | 0.0134             | <.0001         | 0.2091                        | 0.1381             | <.0001           |
| <b>Week 12</b>                              | n       | 6                             | 6                  | 6              | 4                             | 4                  | 4                |
|                                             | Mean    | 0.2                           | -1.0               | -87.7          | 0.2                           | -2.0               | -84.6            |
|                                             | 90% CI  | (0.1, 0.3)                    | (-1.5, -0.6)       | (-93.5, -81.9) | (-0.2, 0.6)                   | (-4.6, 0.5)        | (-96.7, -72.5)   |
|                                             | P-value | 0.0225                        | 0.0054             | <.0001         | 0.2658                        | 0.1539             | 0.0005           |
| <b>Clone size (PNH red blood cells) (%)</b> |         |                               |                    |                |                               |                    |                  |
| <b>Baseline</b>                             | n       | 6                             |                    |                | 6                             |                    |                  |
|                                             | Mean    | 33.6                          |                    |                | 49.1                          |                    |                  |
|                                             | 90% CI  | (18.7, 48.6)                  |                    |                | (24.7, 73.6)                  |                    |                  |
| <b>Week 2</b>                               | n       | 7                             | 6                  | 6              | 5                             | 5                  | 5                |
|                                             | Mean    | 54.9                          | 20.9               | 88.8           | 65.6                          | 20.5               | 146.3            |
|                                             | 90% CI  | (45.4, 64.5)                  | (11.2, 30.6)       | (28.0, 149.7)  | (37.7, 93.6)                  | (13.6, 27.3)       | (-63.9, 356.5)   |
|                                             | P-value | <.0001                        | 0.0075             | 0.0322         | 0.0074                        | 0.0032             | 0.2120           |
| <b>Week 4</b>                               | n       | 7                             | 6                  | 6              | 5                             | 5                  | 5                |
|                                             | Mean    | 65.9                          | 30.4               | 130.5          | 73.7                          | 28.5               | 243.0            |
|                                             | 90% CI  | (56.4, 75.4)                  | (17.0, 43.8)       | (42.6, 218.4)  | (50.3, 97.2)                  | (18.7, 38.4)       | (-137.4, 623.5)  |
|                                             | P-value | <.0001                        | 0.0060             | 0.0304         | 0.0026                        | 0.0035             | 0.2449           |
| <b>Week 8</b>                               | n       | 7                             | 6                  | 6              | 5                             | 5                  | 5                |
|                                             | Mean    | 79.6                          | 43.9               | 186.9          | 85.1                          | 39.9               | 395.9            |
|                                             | 90% CI  | (69.1, 90.1)                  | (26.3, 61.5)       | (65.7, 308.2)  | (69.4, 100.7)                 | (23.4, 56.3)       | (-261.9, 1053.6) |
|                                             | P-value | <.0001                        | 0.0040             | 0.0266         | 0.0003                        | 0.0066             | 0.2688           |
| <b>Week 12</b>                              | n       | 6                             | 5                  | 5              | 4                             | 4                  | 4                |
|                                             | Mean    | 82.9                          | 43.4               | 167.5          | 91.1                          | 46.8               | 642.7            |
|                                             | 90% CI  | (73.1, 92.7)                  | (26.3, 60.6)       | (41.4, 293.7)  | (81.8, 100.3)                 | (13.0, 80.5)       | (-639.4, 1924.8) |
|                                             | P-value | <.0001                        | 0.0057             | 0.0473         | 0.0002                        | 0.0471             | 0.3231           |

4 Note: Change refers to change from baseline.

5 CI, confidence interval; SD, standard deviation; PNH, paroxysmal nocturnal hemoglobinuria

1 **Supplementary Table 3. Incidence of AEs by preferred term (full analysis set)**

2

|                                      | Treatment period 1<br>Iptacopan |              | Treatment period 2<br>Iptacopan |               | Extension phase<br>Iptacopan |               |
|--------------------------------------|---------------------------------|--------------|---------------------------------|---------------|------------------------------|---------------|
|                                      | 25 mg<br>n=7                    | 50 mg<br>n=6 | 100 mg<br>n=7                   | 200 mg<br>n=5 | 100 mg<br>n=5                | 200 mg<br>n=3 |
| Patients with at least one AE, n (%) | 2 (28.6)                        | 4 (66.7)     | 3 (42.9)                        | 1 (20.0)      | 2 (40.0)                     | 2 (66.7)      |
| Headache                             | 0                               | 3 (50.0)     | 0                               | 0             | 1 (20.0)                     | 0             |
| Upper respiratory tract infection    | 0                               | 0            | 2 (28.6)                        | 0             | 0                            | 0             |
| Cough                                | 2 (28.6)                        | 0            | 1 (14.3)                        | 0             | 1 (20.0)                     | 1 (33.3)      |
| Abdominal discomfort                 | 0                               | 0            | 0                               | 0             | 2 (40.0)                     | 0             |
| Abdominal pain                       | 0                               | 0            | 0                               | 0             | 1 (20.0)                     | 0             |
| Musculoskeletal chest pain           | 0                               | 0            | 1 (14.3)                        | 0             | 0                            | 0             |
| Dry throat                           | 0                               | 0            | 1 (14.3)                        | 0             | 0                            | 0             |
| Abdominal distension                 | 1 (14.3)                        | 0            | 0                               | 0             | 0                            | 0             |
| Flatulence                           | 0                               | 0            | 1 (14.3)                        | 0             | 0                            | 0             |
| Impaired fasting glucose             | 0                               | 0            | 1 (14.3)                        | 0             | 0                            | 0             |
| Oropharyngeal pain                   | 1 (14.3)                        | 0            | 0                               | 0             | 1 (20.0)                     | 0             |
| Nasopharyngitis                      | 0                               | 0            | 0                               | 1 (20.0)      | 0                            | 0             |
| Back pain                            | 0                               | 0            | 0                               | 0             | 0                            | 1 (3.3)       |
| Hematuria                            | 0                               | 0            | 0                               | 0             | 1 (20.0)                     | 0             |
| Dyspepsia                            | 0                               | 0            | 0                               | 0             | 1 (20.0)                     | 0             |
| Joint stiffness                      | 0                               | 0            | 0                               | 0             | 1 (20.0)                     | 0             |
| Pyrexia                              | 1 (14.3)                        | 0            | 0                               | 0             | 1 (20.0)                     | 0             |
| Blood alkaline phosphatase increase  | 0                               | 1 (16.7)     | 0                               | 0             | 1 (20.0)                     | 0             |
| Reverse tri-iodothyronine increase   | 0                               | 0            | 1 (14.3)                        | 0             | 0                            | 0             |
| Thyroxine-free increase              | 0                               | 0            | 1 (14.3)                        | 0             | 0                            | 0             |
| Blood luteinizing hormone increase   | 0                               | 0            | 0                               | 0             | 1 (20.0)                     | 0             |
| Gamma-glutamyl transferase increase  | 0                               | 0            | 0                               | 0             | 1 (20.0)                     | 0             |

3 AE, adverse events

1 **Supplementary Table 4. Pharmacokinetic parameters of iptacopan 25, 50, 100 and 200**  
 2 **mg doses on day 29 and 57 (pharmacokinetic analysis)**  
 3

| Pharmacokinetic parameter (Unit)             | Day 29                  |                         | Day 57                   |                          |
|----------------------------------------------|-------------------------|-------------------------|--------------------------|--------------------------|
|                                              | Iptacopan 25 mg bid n=7 | Iptacopan 50 mg bid n=5 | Iptacopan 100 mg bid n=6 | Iptacopan 200 mg bid n=5 |
| AUC <sub>last</sub> (hr*ng/mL)               | 6290<br>(4000 - 9860)   | 8570<br>(6490 - 9920)   | 11900<br>(8940 - 14900)  | 19900<br>(12400 - 27400) |
| C <sub>max</sub> (ng/mL)                     | 1450<br>(830 - 2700)    | 1800<br>(1270 - 2140)   | 2640<br>(2040 - 3650)    | 4520<br>(2980 - 6730)    |
| T <sub>max</sub> (hr), Median<br>(min – max) | 2.00<br>(1.00 - 4.00)   | 2.00<br>(1.00 - 2.00)   | 1.53<br>(0.833 - 2.00)   | 2.00<br>(1.00 - 4.13)    |

4 Data represented as mean (minimum – maximum) unless specified  
 5  
 6  
 7

1 **Supplementary Figure 1. Treatment duration of iptacopan (full analysis set)**  
 2

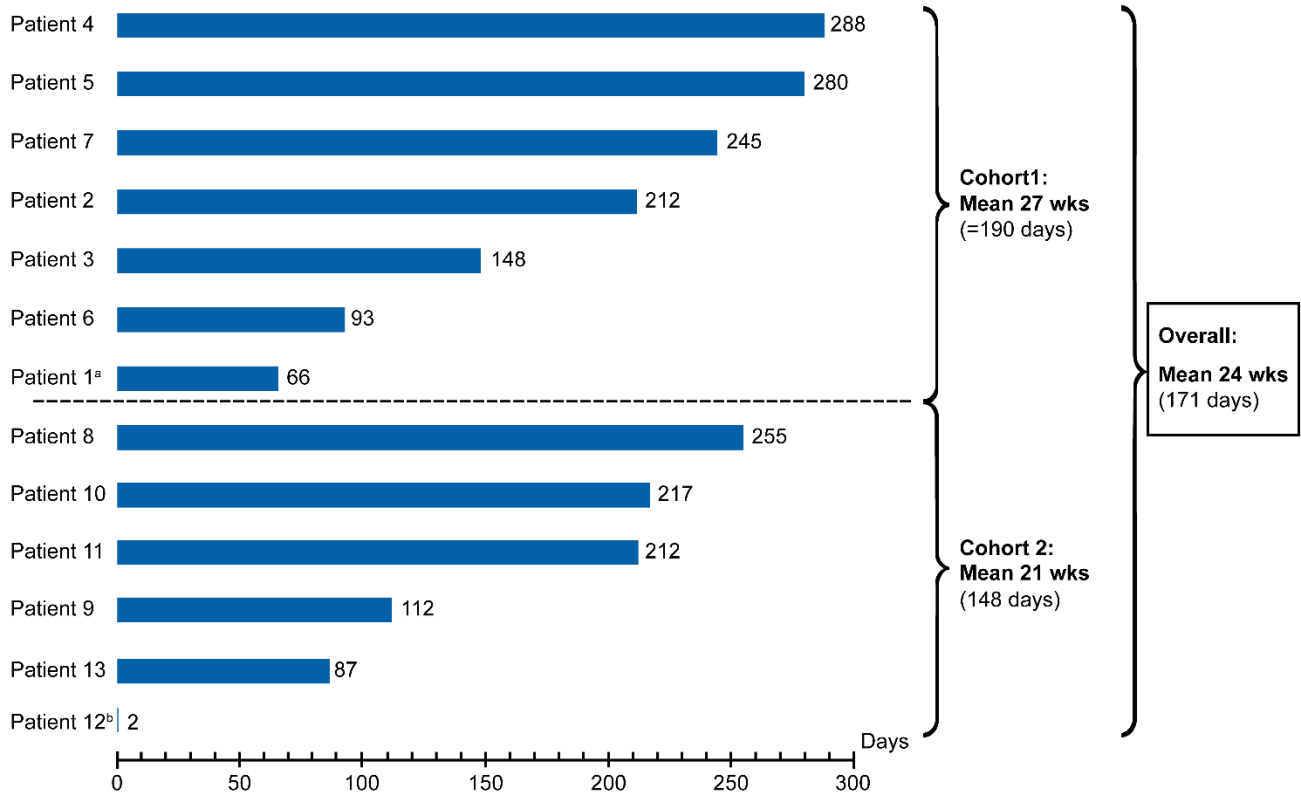

3

4 <sup>a</sup>One patient in cohort 1 started study drug taper prior to cutoff and discontinued after cutoff by patient preference and upon  
 5 physician decision

6 <sup>b</sup>One patient in cohort 2 discontinued after 2 days of dosing due to non-severe AE of headache

1 **Supplementary Figure 2. Change in markers of hemolysis over time for iptacopan 25 /**  
2 **100 mg and 50 / 200 mg cohorts (pharmacodynamic analysis set)**  
3 **Reticulocytes**

4

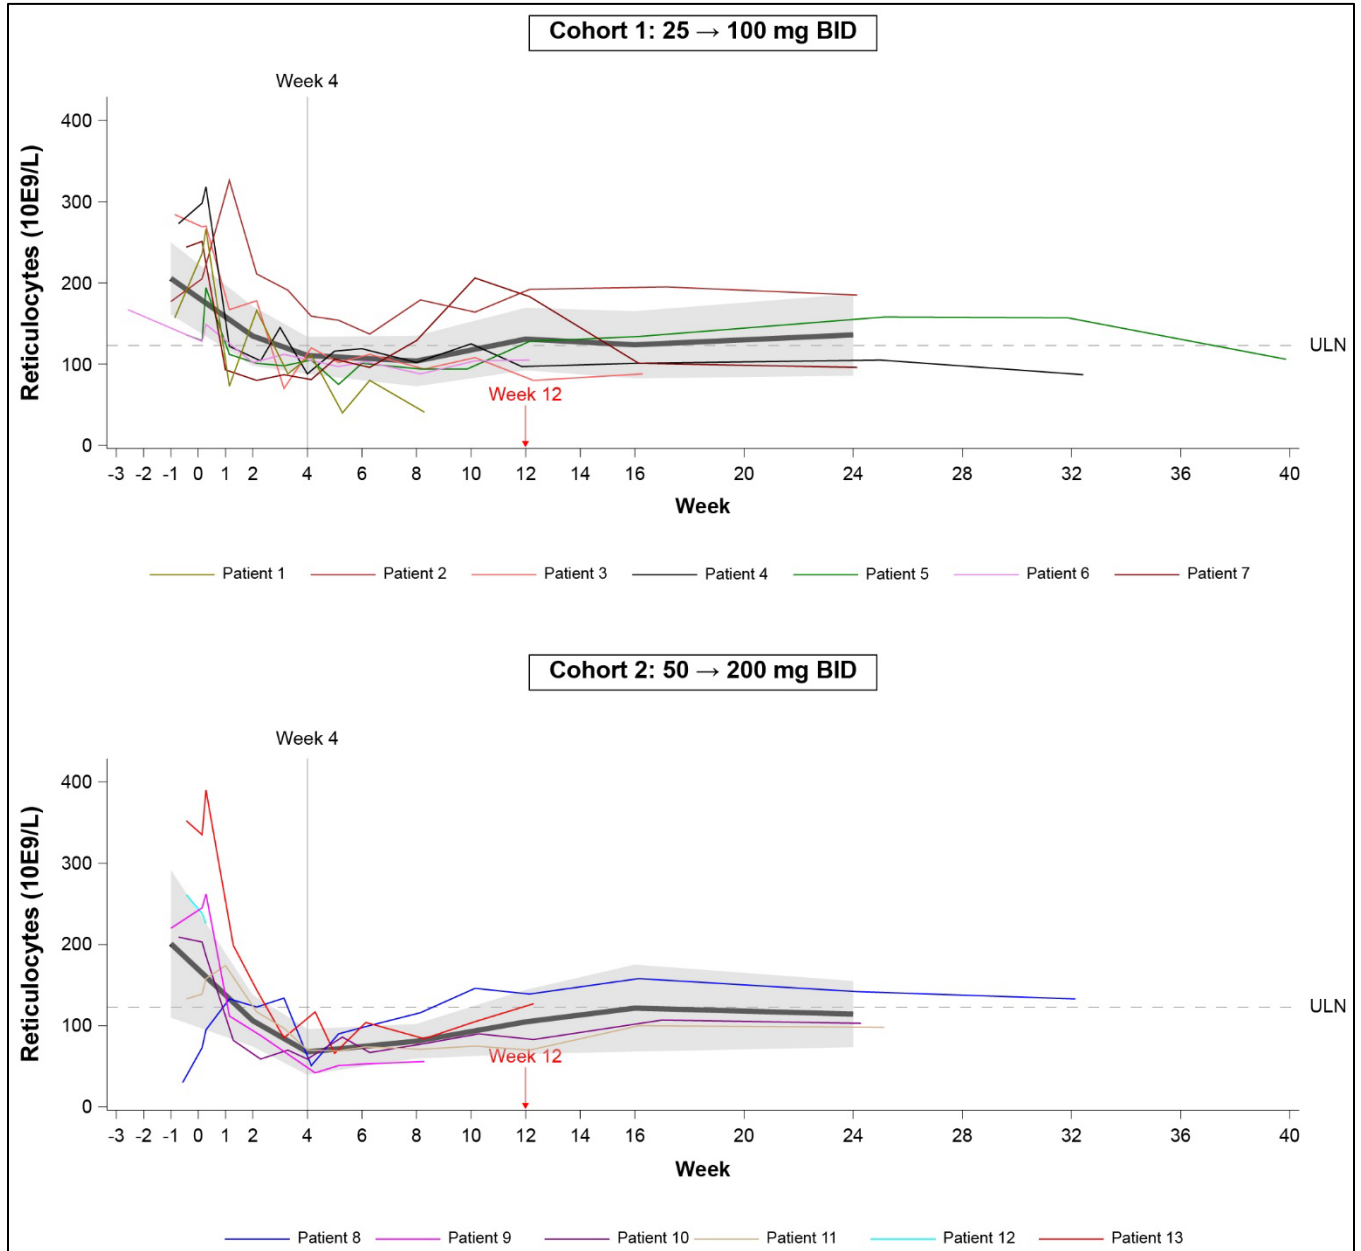

5

6 BID, twice daily

7



1

# Bilirubin

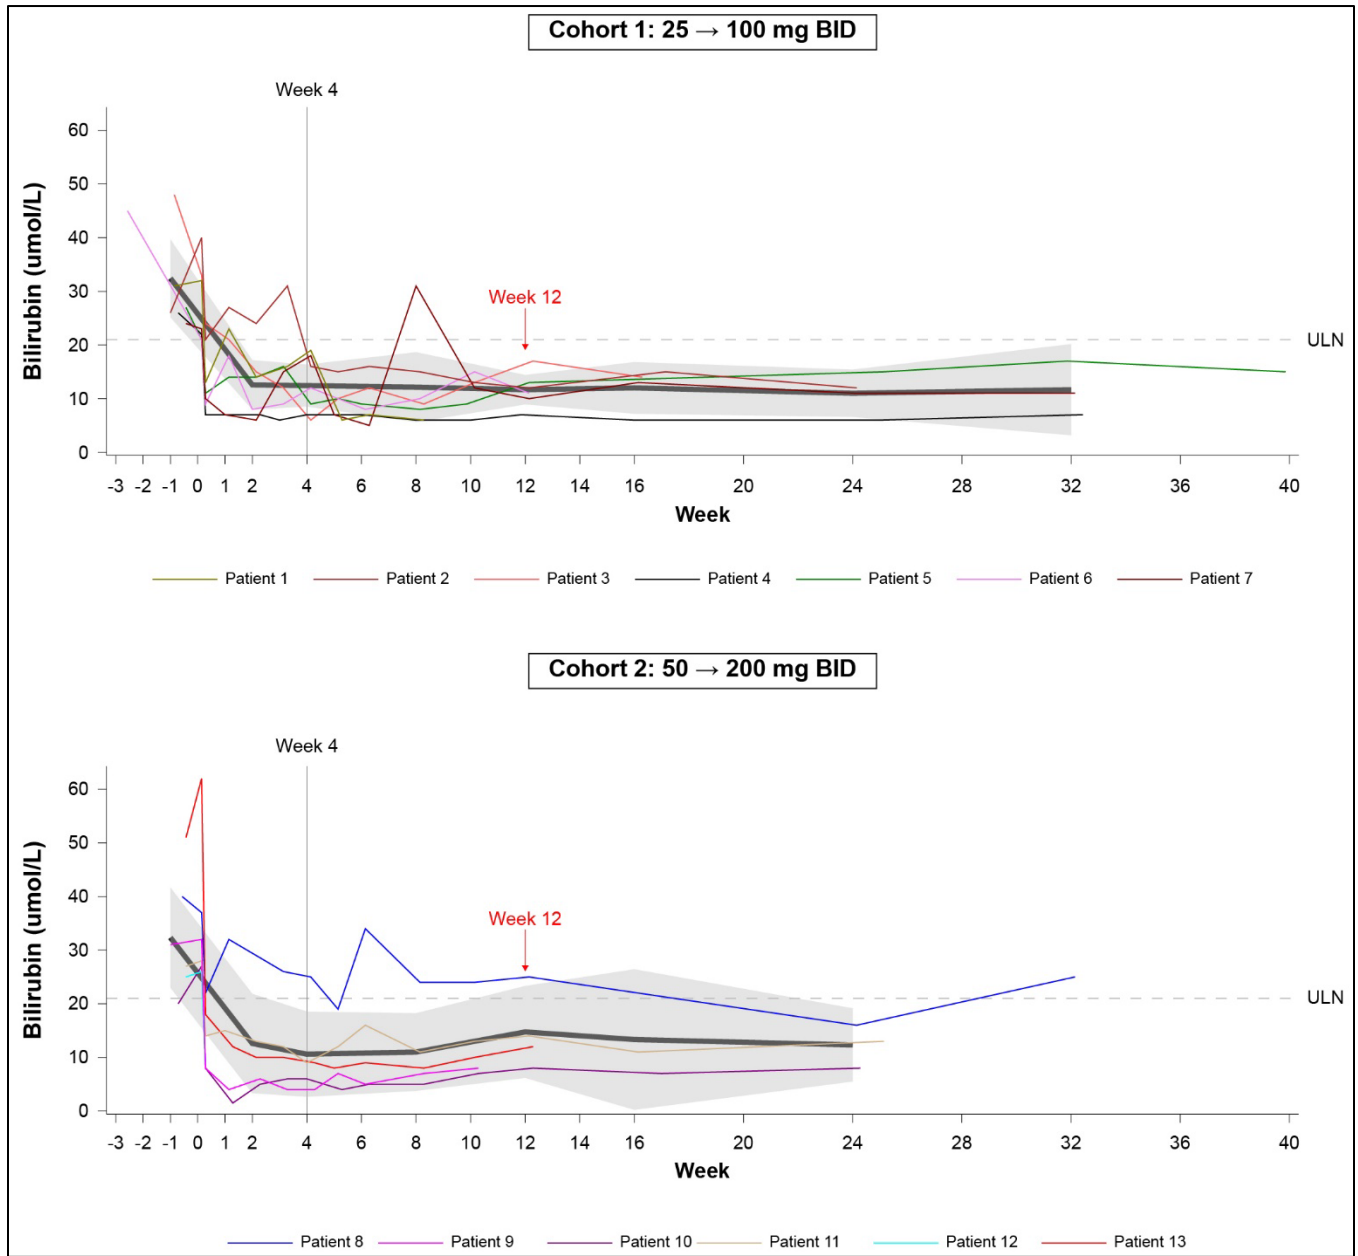

2

3 BID, twice daily

4

1

# Haptoglobin

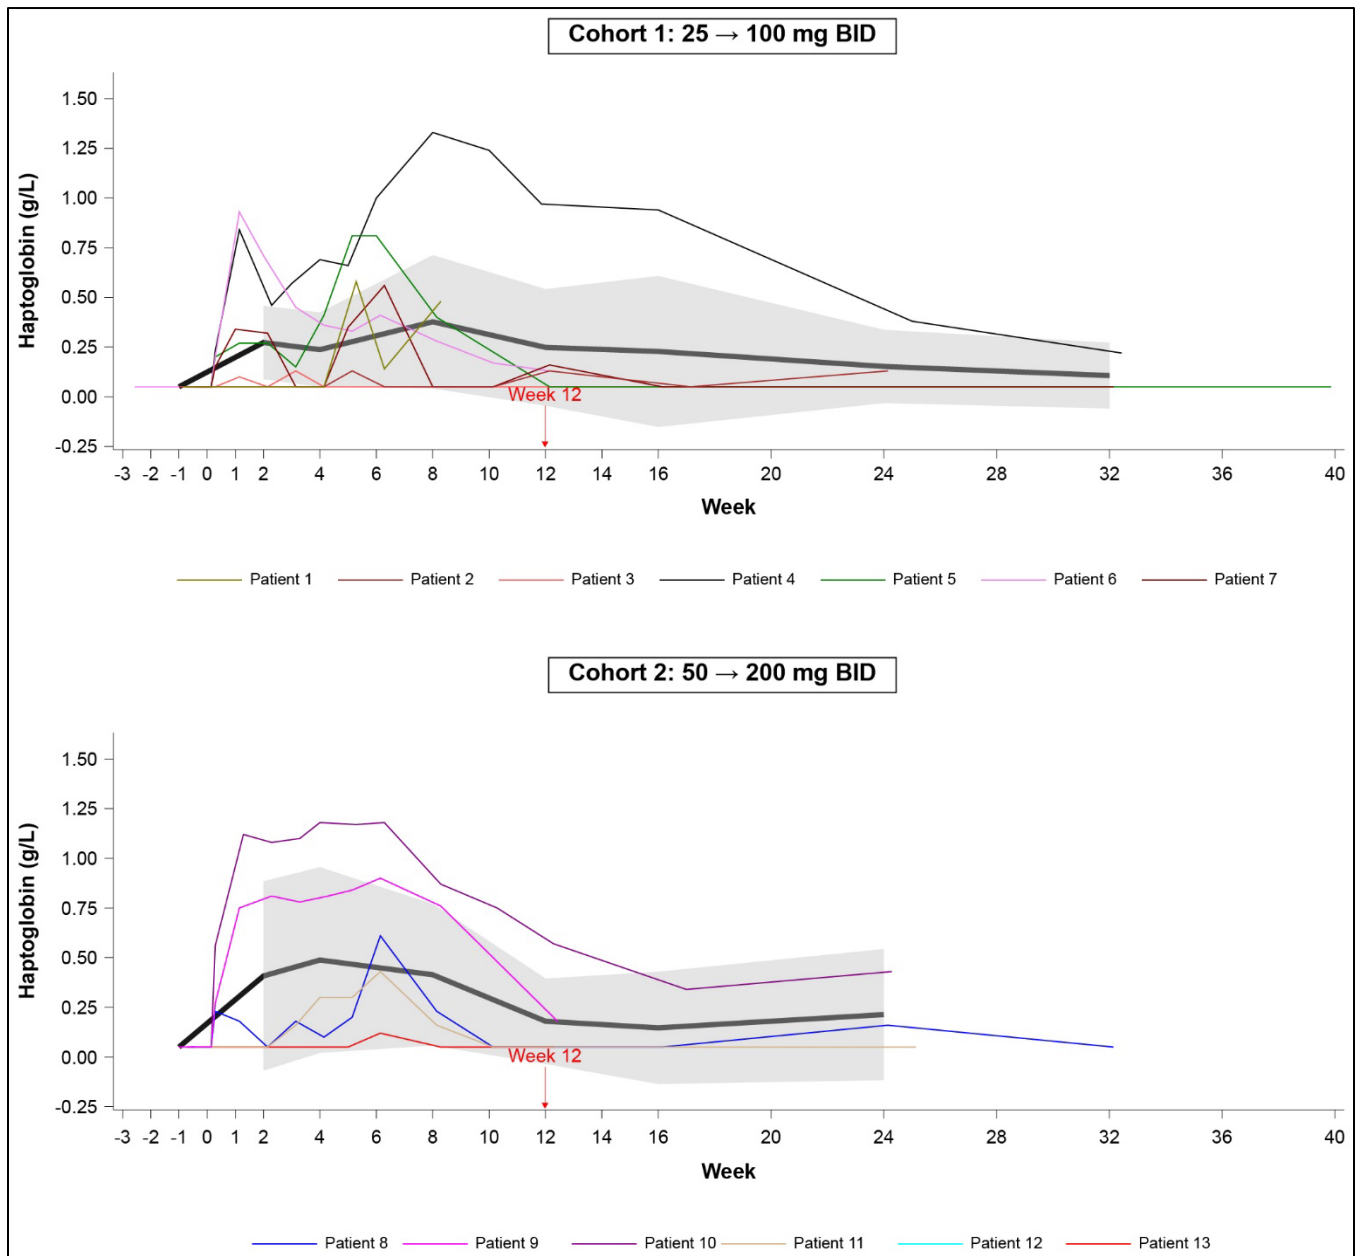

2

3 BID, twice daily

4

1

### Free Hemoglobin

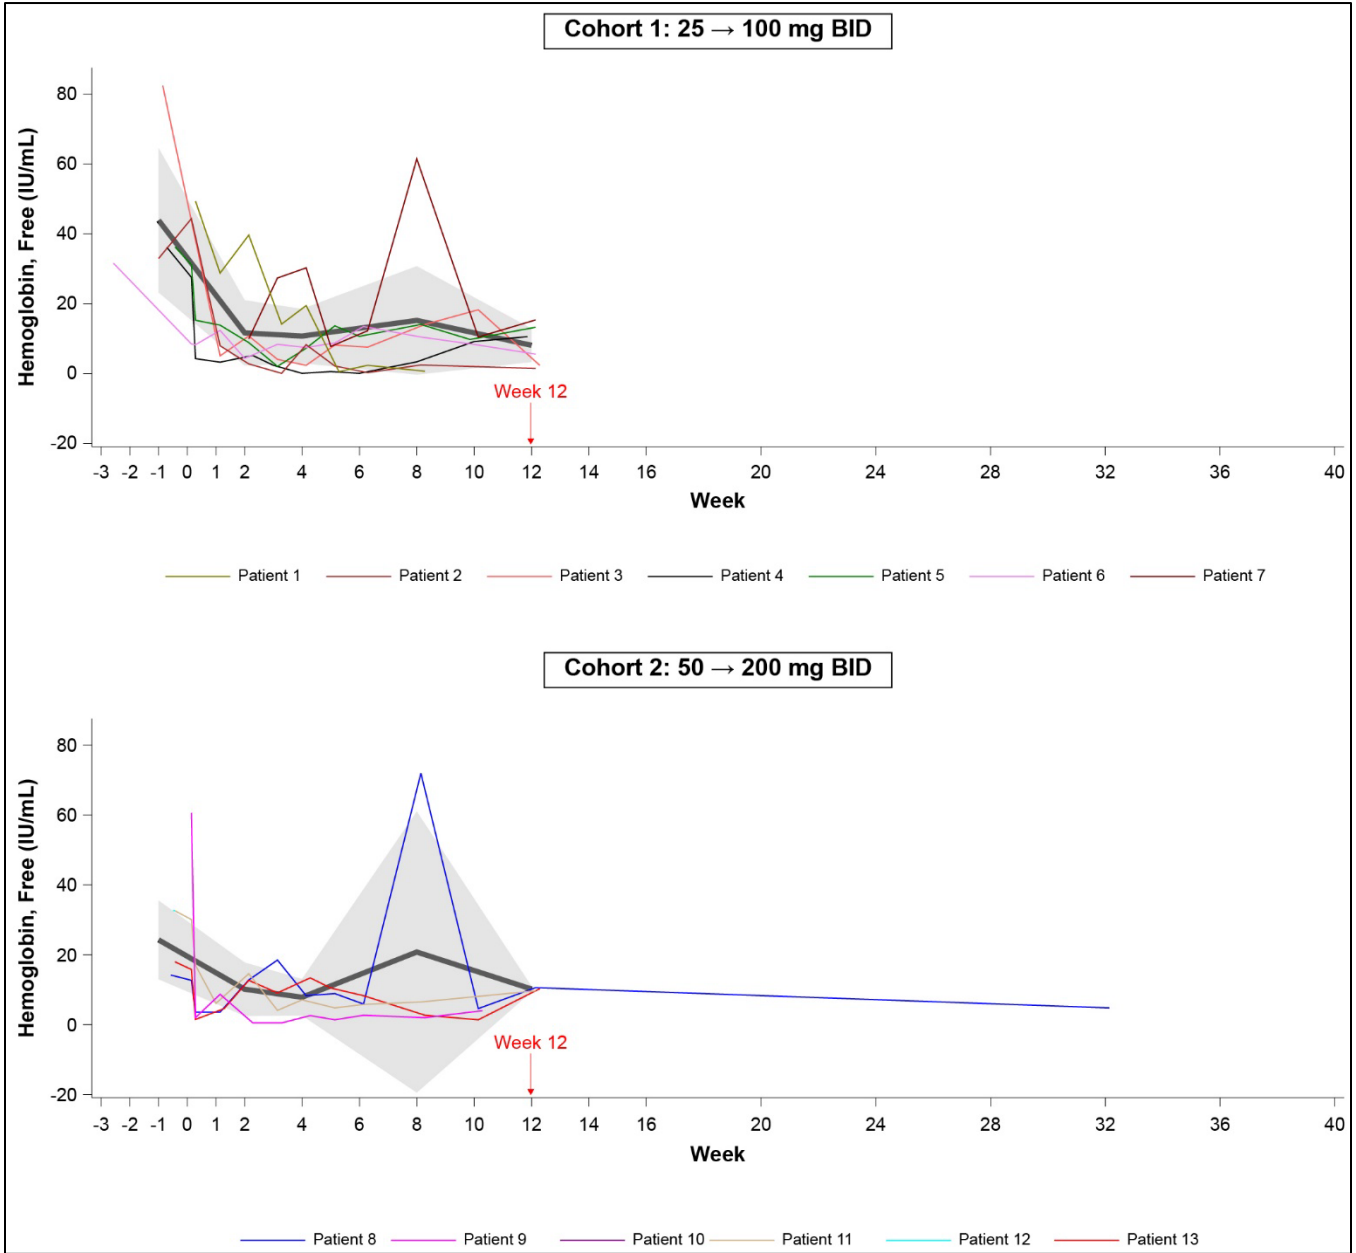

2

3 BID, twice daily

4

5

1 **Supplementary Figure 3. Exposure-response of blood lactate dehydrogenase levels (A),**  
2 **hemoglobin (B), C3d deposition (C), PNH clone size (D), Bb plasma concentrations (E)**  
3 **and inhibition of complement by the Wieslab assay (F)**

4

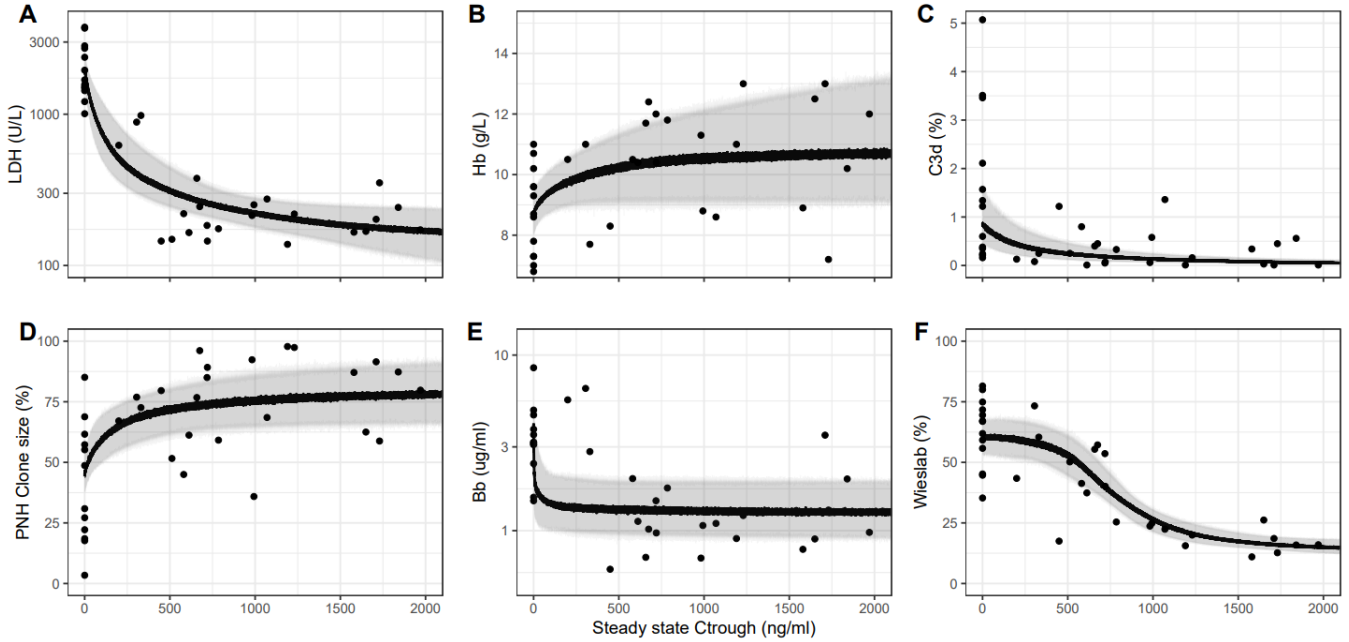

5

6 Hb, hemoglobin; LDH, lactate dehydrogenase; PNH, paroxysmal nocturnal hemoglobinuria

7 Exposure-response data at baseline, days 29 and 57 was used to fit sigmoid Emax functions for each variable using nonlinear  
8 mixed effect modeling. Black line: model prediction including residual variability. Grey shaded area: 90% confidence interval of  
9 the model.

10

11

1 **Supplementary text**

2

3 **Method description for Wieslab Complement assay (alternative pathway)**

4 Assessment of the effect of iptacopan on the complement alternative pathway was performed  
5 using a commercially available assay (Wieslab® Complement system (alternative pathway),  
6 Euro Diagnostica, COMPL AP330). In brief, the wells of the microtiter strips were pre-coated  
7 with specific activators of the alternative pathway (lipopolysaccharide). The calibration  
8 standards (STDs), the quality controls (QCs) and the unknown serum samples were diluted  
9 1:18 in Diluent AP, containing a specific blocker to ensure that only the alternative pathway is  
10 activated. 100 µl of diluted STDs, QCs and unknown serum samples were added to the wells  
11 and incubated for 1 h at 37°C. After a washing step, 100 µl of alkaline phosphatase-conjugated  
12 antihuman C5b-9 was added to each well. The plate was incubated for 30 min at room  
13 temperature (RT), following by an additional washing step. 100 µl substrate solution was  
14 added to each well, followed by incubation for 30 min at RT. Absorbance values were read at  
15 405 nm on a microplate reader. Samples were measured in duplicates.

16 Calibration standards (STDs) and quality control (QC) samples were used to define  
17 acceptance criteria for each analytical run. Human serum obtained from healthy volunteers  
18 was used as blank matrix for the preparation of QC samples. Human, heat-inactivated serum  
19 from male AB plasma (Sigma Aldrich Chime SARL Ref. H3667) was used as negative control  
20 and for the preparation of calibration standards and for the dilution of QC samples. No  
21 minimum dilution of unknown serum was required.

22 The data was analyzed using SoftMax® Pro, version GxP 6.5 (Molecular Devices, Sunnyvale,  
23 U.S.A) and Watson® LIMS, Version 7.4.2 SP1 (Thermo Electron Corporation, Philadelphia, PA,

- 1 U.S.A). The complement alternative pathway activity was calculated as mean from the
- 2 duplicates and reported as percentage (%).
